# Supplementary material for: A novel bimetallic MOFs combined with gold nanoflakes in electrochemical sensor for measuring bisphenol A
Source: Royal Society of Chemistry journal article supplement (doi:10.1039/d2ra06300j), 2022-01-01
Supplement: d2ra06300j1.pdf [file d2ra06300j1.pdf]

**A novel bimetallic MOFs combined with gold nanoflakes in electrochemical sensor for  
measuring bisphenol A**

*(Supplementary)*

Manh B. Nguyen<sup>1</sup>, Nguyen Hai Anh<sup>2</sup>, Vu Thi Thu<sup>3</sup>, Pham Thi Hai Yen<sup>1</sup>, Pham Hong Phong<sup>1</sup>, Le  
Quoc Hung<sup>1</sup>, Nguyen Thi Thanh Ngan<sup>3</sup>, Tran Quang Hai<sup>2</sup>, and Vu Thi Thu Ha<sup>1\*</sup>

<sup>1</sup>Institute of Chemistry, Vietnam Academy of Science and Technology, 18 Hoang Quoc Viet  
Street, Cau Giay District, Hanoi, Viet Nam

<sup>2</sup>Hanoi University of Industry, 298 Cau Dien Street, Bac Tu Liem District, Hanoi, Viet Nam

<sup>3</sup>University of Science and Technology of Hanoi, Vietnam Academy of Science and Technology,  
18 Hoang Quoc Viet Street, Cau Giay District, Hanoi, Viet Nam

Corresponding author: Vu Thi Thu Ha, Email: [havt@ich.vast.vn](mailto:havt@ich.vast.vn)

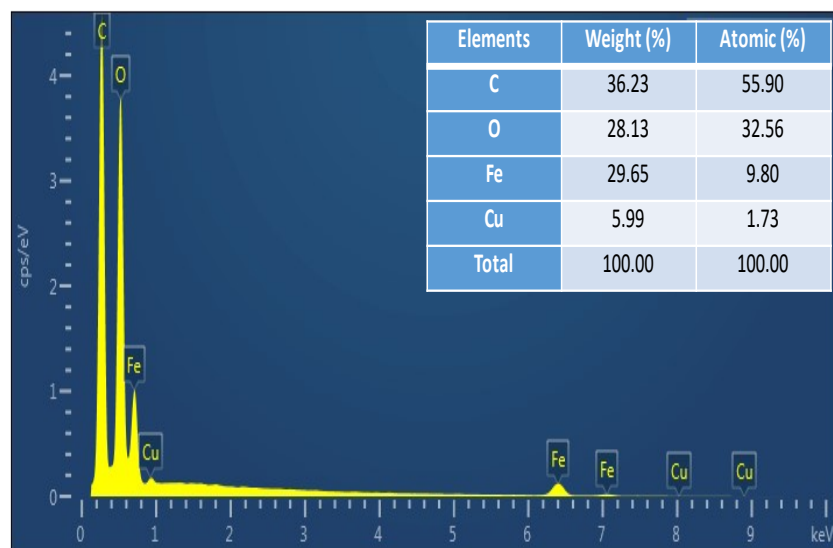

**Fig. S1** EDS spectrum of Fe-Cu-BTC sample

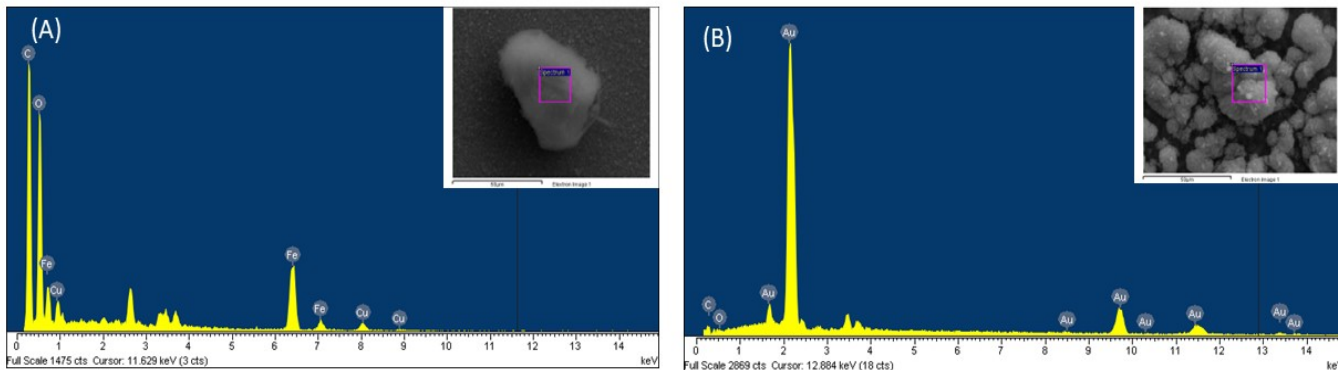

**Fig. S2** EDS spectrum of Fe-Cu-BTC and Fe-Cu-BTC/AuNPs sample on GCE

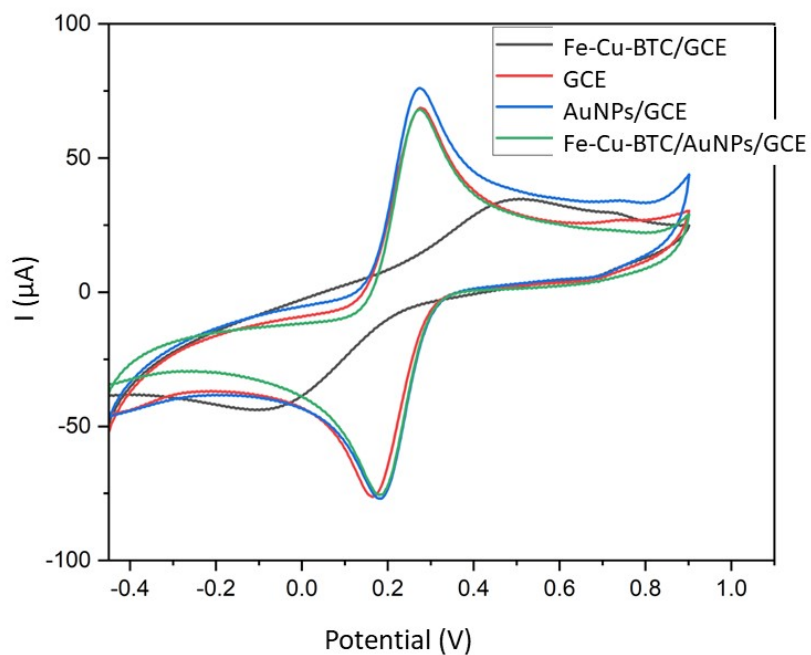

**Fig. S3** CVs of bare GCE, Fe-Cu-BTC/ GCE, AuNPs/GCE and Fe-Cu-BTC/AuNPs/GCE from - 0.3V - 0.9V in  $K_3Fe(CN)_6$  5mM/ PBS 0.1M, pH 7

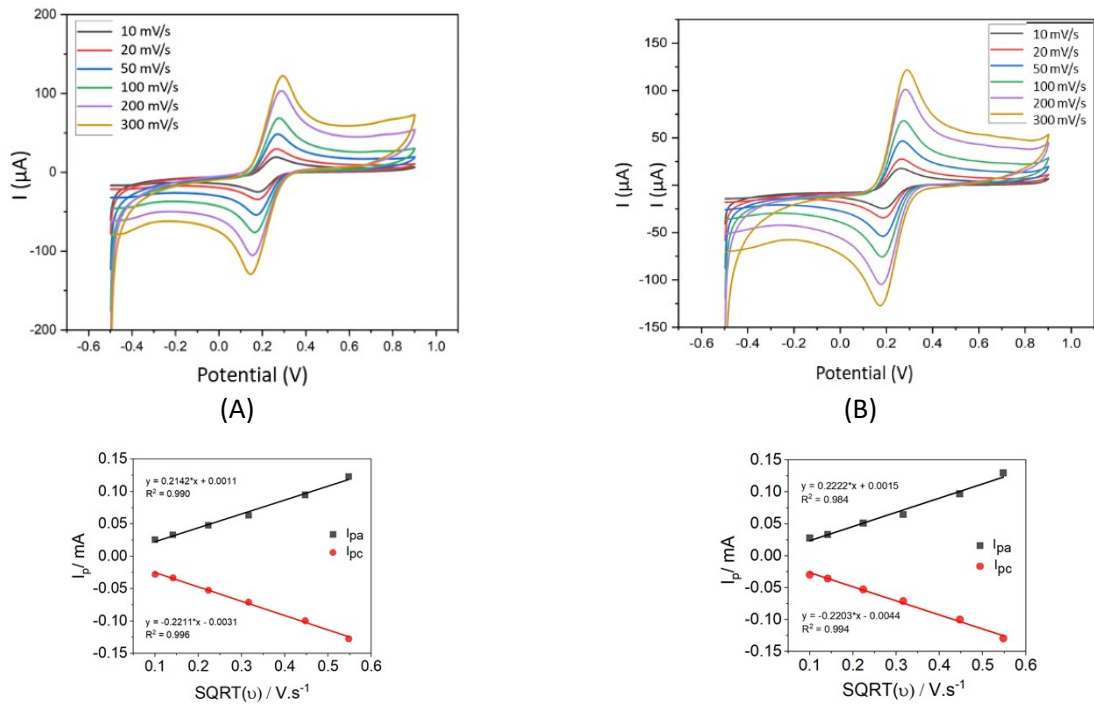

**Fig. S4.** CVs of GCE (A) and Fe-Cu-BTC/AuNPs/GCE (B) in 5mM  $K_3Fe(CN)_6/K_4Fe(CN)_6$  + 0.1M KCl at different scan rates and relationship between  $I_{pa}$ ,  $i_{pc}$  and square roots of scan rates

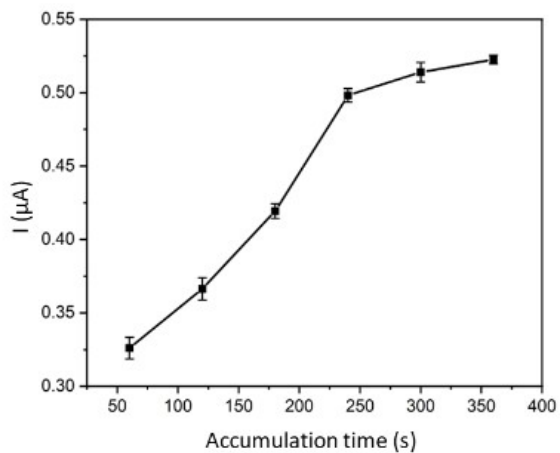

**Fig. S5** Effects of accumulation time of BPA on DPV current

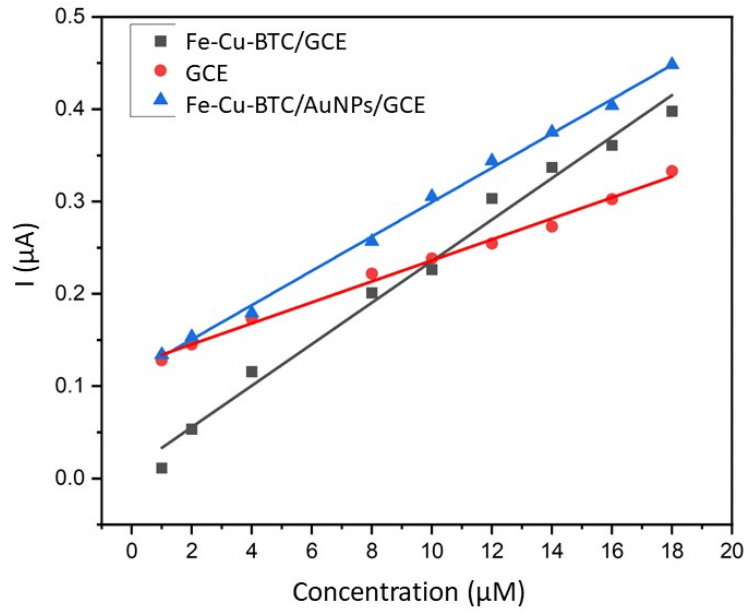

**Fig. S6** The relationship between current concentration recorded on GCE, Fe-Cu-BTC/GCE and Fe-Cu-BTC/AuNPs/GCE

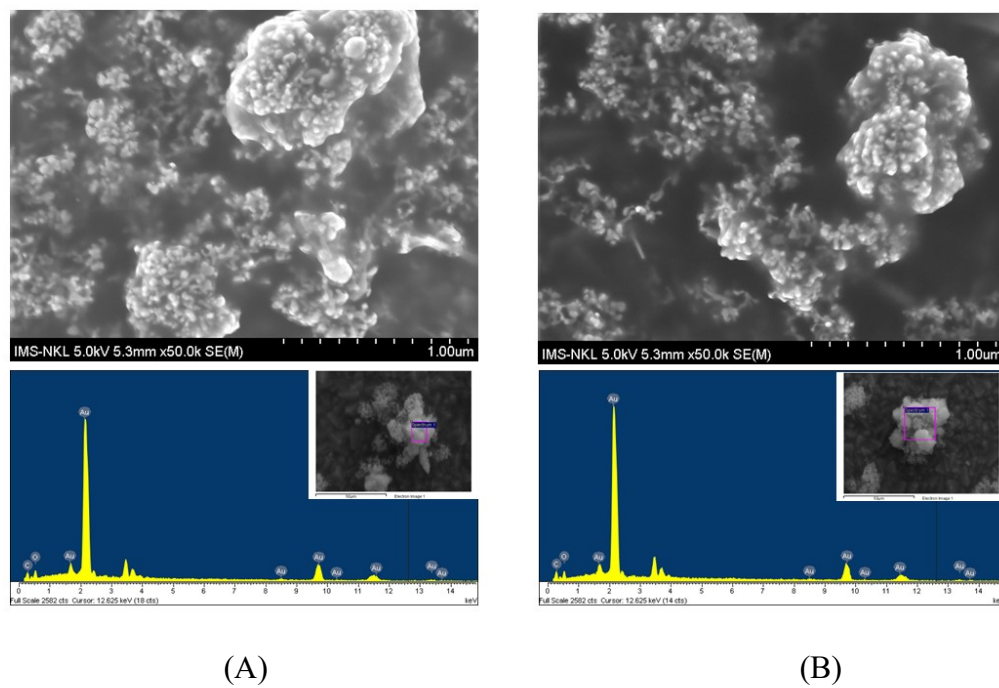

**Fig. S7** The SEM and XRD of the Fe-Cu-BTC/AuNPs composite before (A) and after (B) BPA measurement

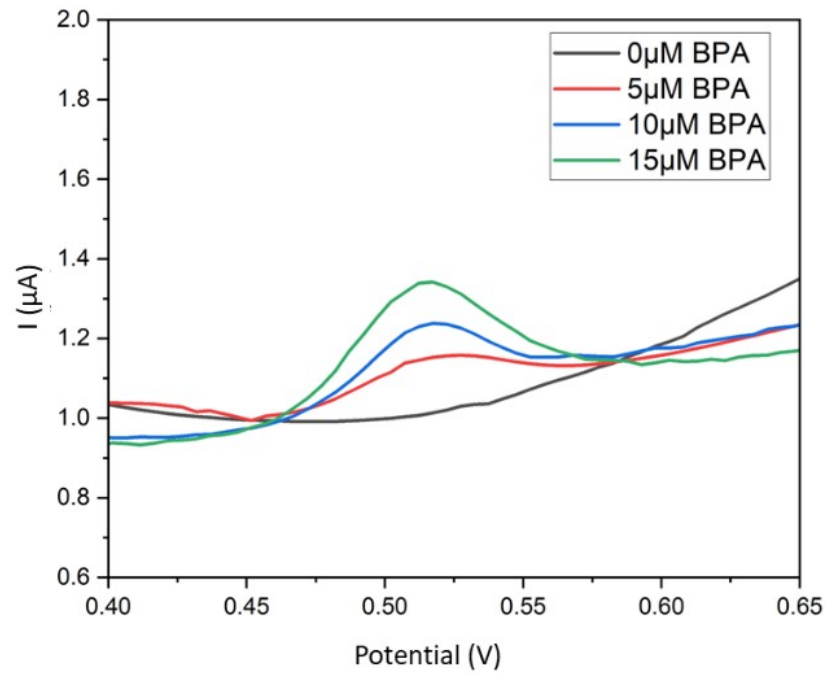

**Fig. S8** Voltammograms of sample extracted from rain coat spiked BPA at different concentrations recorded on Fe-Cu-BTC/AuNPs/GCE sensor
